# Supplementary material for: What they say and what they do: comparing physical activity across the USA, England and the Netherlands
Source: PubMed Central journal article supplement — J Epidemiol Community Health. 2018 Apr 11;72(6):471–6. doi: 10.1136/jech-2017-209703 (PMC5969391; doi:10.1136/jech-2017-209703), 2018-04-11
Supplement: jech-2017-209703supp001.pdf [file jech-2017-209703supp001.pdf]

Online supplement

**Table S1: Sample Summary Statistics — Age 50+**

|             | NL (LISS) | US (UAS) | England (ELSA) |
|-------------|-----------|----------|----------------|
| Married     | 61%       | 58%      | 60%            |
| Female      | 48%       | 47%      | 48%            |
| Low         | 42%       | 22%      | 57%            |
| Medium      | 28%       | 36%      | 23%            |
| High        | 30%       | 42%      | 20%            |
| Working     | 34%       | 49%      | 30%            |
| Age(51-64)  | 52%       | 64%      | 38%            |
| Age(65+)    | 48%       | 36%      | 62%            |
| White/Dutch | 88%       | 86%      | 97%            |
| N           | 447       | 275      | 254            |

England: High: nvq4/nvq5/degree or equivalent; Medium: higher education below degree or nvq3/GCE A level equivalent; Low: nvq2/GCE O level equivalent or nvq1/CSE other grade equivalent or no qualification. For individuals with foreign qualifications, Low: education not finished or finished continuous full time education at 15 and below; Medium: finished continuous full time education between 16-17; High: finished continuous full time education at 18 and above.

**Table S2: Intensity of PA (50+) (Dependent variable: 7 days mean accelerometer data)**

|                                              | NL (LISS)             | Interacton with US dummy | Interaction with England dummy |
|----------------------------------------------|-----------------------|--------------------------|--------------------------------|
| <i>Vigorous (reference is "hardly ever")</i> |                       |                          |                                |
| One to three times a month                   | 17.590<br>(7.715)**   | -22.398<br>(10.818)**    | -30.457<br>(13.020)**          |
| Once a week                                  | 12.823<br>(5.904)**   | -20.325<br>(10.714)*     | -29.159<br>(11.170)***         |
| More than once a week                        | 19.540<br>(5.471)***  | -1.295<br>(8.991)        | -40.480<br>(8.893)***          |
| <i>Moderate (reference is "hardly ever")</i> |                       |                          |                                |
| One to three times a month                   | 10.908<br>(7.511)     | -3.952<br>(11.696)       | -13.129<br>(10.759)            |
| Once a week                                  | 12.595<br>(7.120)*    | 4.554<br>(11.938)        | -16.310<br>(13.080)            |
| More than once a week                        | 22.518<br>(7.015)***  | -10.998<br>(11.020)      | -34.793<br>(10.953)***         |
| <i>Mild (reference is "hardly ever")</i>     |                       |                          |                                |
| One to three times a month                   | 2.994<br>(9.206)      | 16.503<br>(16.476)       | -16.116<br>(13.399)            |
| Once a week                                  | -16.022<br>(7.671)**  | 39.946<br>(14.748)***    | 17.315<br>(25.360)             |
| More than once a week                        | -6.977<br>(6.589)     | 41.640<br>(14.239)***    | 4.939<br>(13.688)              |
| US                                           |                       | -69.783<br>(12.257)***   |                                |
| England                                      |                       |                          | 3.491<br>(7.587)               |
| Constant                                     | 166.759<br>(4.985)*** |                          |                                |
| N                                            | 969                   |                          |                                |
| R-sq                                         | 0.270                 |                          |                                |

Standard errors are in parentheses; \* p&lt;0.10; \*\* p&lt;0.05; \*\*\* p&lt;0.01
